# Supplementary material
Source: PubMed Central journal article supplement (PMC1903382)
Supplement: nar_gkl653_2.pdf [file nar_gkl653_2.pdf]

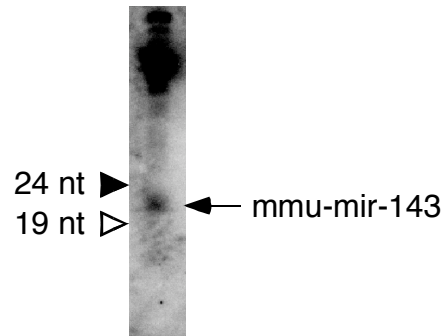

**Supplementary Figure S1**

Northern blot analysis of the small-RNA fraction isolated from Jurkat cells. The blot was probed with oligonucleotides specific for hsa-miR-143. Closed and open arrowheads indicate the positions of 24 and 19 nt, respectively.
